# Supplementary material for: Ang II-Induced Hypertension Exacerbates the Pathogenesis of Tuberculosis
Source: MDPI journal article supplement (doi:10.3390/cells10092478), 2021-09-19
Supplement: s1 [file s1]

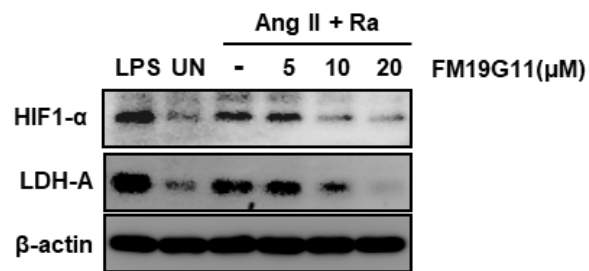

**Supplementary Figure S 1. Ang II-induced LDH-A production is dependent on HIF1- $\alpha$  production during *Mtb* infection.** BMDM cells were pretreated with FM19G11 (HIF1- $\alpha$  modulator, 5–20  $\mu$ M) for 1 hour and were incubated with Ang II (1  $\mu$ M) during *Mtb* infection (MOI = 1). Western blotting analysis was performed to examine the expression levels of HIF1- $\alpha$ , LDH-A protein at 24 hours after infection. LPS (500 ng/mL, 24 hours) was used as a positive control.
